# Supplementary material for: Highly efficient CO2 electrolysis to CO on Ruddlesden–Popper perovskite oxide with in situ exsolved Fe nanoparticles
Source: Royal Society of Chemistry journal article supplement (doi:10.1039/d0ta11328j), 2021-01-01
Supplement: d0ta11328j1.pdf [file d0ta11328j1.pdf]

## Supporting Information

# Highly efficient CO<sub>2</sub> electrolysis to CO on Ruddlesden popper perovskite oxide with *in situ* exsolved Fe nanoparticles

*Junil Choi<sup>a</sup>, Seongmin Park<sup>a</sup>, Hyunsu Han<sup>a</sup>, Minho Kim<sup>a</sup>, Minseon Park<sup>a</sup>, Jeonghyeon Han<sup>a</sup>  
and Won Bae Kim<sup>a\*</sup>*

<sup>a</sup> Department of Chemical Engineering, Pohang University of Science and Technology  
(POSTECH), 77 Cheongam-ro, Nam-gu, Pohang, Gyeongbuk, 37673, Republic of Korea

---

\* Corresponding author  
Tel: 82-54-279-2397  
Fax: 82-54-279-5528  
E-Mail: [kimwb@postech.ac.kr](mailto:kimwb@postech.ac.kr)

**Table S1.** Comparison of CO<sub>2</sub> electro-conversion performance to CO over ceramic-based cathodes with exsolved metal nanoparticles.

| Catalyst                                                                                                                                                   | Exsolved element  | Gas condition                      | Current density at 1.5 V (A·cm <sup>-2</sup> ) | Faraday efficiency (%) | Reaction time (hour) | Ref              |
|------------------------------------------------------------------------------------------------------------------------------------------------------------|-------------------|------------------------------------|------------------------------------------------|------------------------|----------------------|------------------|
| <b>La<sub>0.6</sub>Sr<sub>0.4</sub>Mn<sub>0.2</sub>Fe<sub>0.8</sub>O<sub>3</sub></b>                                                                       | Fe                | 30% CO/CO <sub>2</sub>             | 2.04 (850 °C)                                  | 97.9                   | 100                  | <b>This work</b> |
| <b>Sr<sub>1.9</sub>Fe<sub>1.5</sub>Mo<sub>0.4</sub>Ni<sub>0.1</sub>O<sub>6-δ</sub></b>                                                                     | Ni-Fe             | 100% CO <sub>2</sub>               | ca. 2.16 (800°C)                               | 98                     | 500                  | [S1]             |
| <b>La<sub>0.6</sub>Sr<sub>0.4</sub>Fe<sub>0.8</sub>Ni<sub>0.2</sub>O<sub>3-δ</sub></b>                                                                     | Ni-Fe             | 30% CO/CO <sub>2</sub>             | ca. 1.49 (850°C)                               | 70                     | 100                  | [S2]             |
| <b>(La<sub>0.65</sub>Sr<sub>0.3</sub>Ce<sub>0.05</sub>)<sub>0.9</sub>(Cr<sub>0.5</sub>Fe<sub>0.5</sub>)<sub>0.85</sub>Ni<sub>0.15</sub>O<sub>3-δ</sub></b> | Ni-Fe             | 30% CO/CO <sub>2</sub>             | ca. 1.43 (850°C)                               | 90.9                   | 100                  | [S3]             |
| <b>La<sub>0.6</sub>Sr<sub>0.4</sub>Co<sub>0.5</sub>Ni<sub>0.2</sub>Mn<sub>0.3</sub>O<sub>3</sub></b>                                                       | Co-Ni             | 30% CO/CO <sub>2</sub>             | 1.08 (850°C)                                   | 97.8                   | 90                   | [S4]             |
| <b>La<sub>0.6</sub>Sr<sub>0.4</sub>Co<sub>0.7</sub>Mn<sub>0.3</sub>O<sub>3</sub></b>                                                                       | Co                | 30% CO/CO <sub>2</sub>             | 1.03 (850°C)                                   | 97.4                   | 12                   | [S5]             |
| <b>Sr<sub>2</sub>Fe<sub>1.35</sub>Mo<sub>0.45</sub>Ni<sub>0.2</sub>O<sub>6-δ</sub></b>                                                                     | FeNi <sub>3</sub> | 5% N <sub>2</sub> /CO <sub>2</sub> | ca. 0.890 (800°C)                              | 97.5                   | 40                   | [S6]             |
| <b>Sr<sub>2</sub>Fe<sub>1.58</sub>Mo<sub>0.5</sub>O<sub>6-δ</sub></b>                                                                                      | Fe                | 100 % CO <sub>2</sub>              | ca. 0.860 (850°C)                              | 85                     | 100                  | [S7]             |
| <b>Pr<sub>0.4</sub>Sr<sub>0.6</sub>Co<sub>0.2</sub>Fe<sub>0.7</sub>Mo<sub>0.1</sub>O<sub>3-δ</sub></b>                                                     | Co-Fe             | 100 % CO <sub>2</sub>              | ca. 0.830 (850°C)                              | 87                     | 100                  | [S8]             |
| <b>(La<sub>0.2</sub>Sr<sub>0.8</sub>)<sub>0.95</sub>Ti<sub>0.85</sub>Mn<sub>0.1</sub>Ni<sub>0.05</sub>O<sub>3+δ</sub></b>                                  | Ni                | 100 % CO <sub>2</sub>              | ca. 0.440 (800°C)                              | 96                     | 100                  | [S9]             |
| <b>(La<sub>0.75</sub>Sr<sub>0.25</sub>)<sub>0.9</sub>(Cr<sub>0.5</sub>Mn<sub>0.5</sub>)<sub>0.9</sub>Cu<sub>0.1</sub>O<sub>3-δ</sub></b>                   | Cu                | 100 % CO <sub>2</sub>              | ca. 0.235 (800°C)                              | 65                     | -                    | [S10]            |
| <b>(La<sub>0.75</sub>Sr<sub>0.25</sub>)<sub>0.9</sub>(Cr<sub>0.5</sub>Mn<sub>0.5</sub>)<sub>0.9</sub>Ni<sub>0.1</sub>O<sub>3-δ</sub></b>                   | Ni                | 100 % CO <sub>2</sub>              | ca. 0.190 (800°C)                              | 80                     | 21                   | [S11]            |

| <b>Temperature (°C)</b> | <b>R<sub>1</sub><br/>(Ω·cm<sup>2</sup>)</b> | <b>R<sub>2</sub><br/>(Ω·cm<sup>2</sup>)</b> |
|-------------------------|---------------------------------------------|---------------------------------------------|
| <b>850</b>              | 0.033                                       | 0.169                                       |
| <b>800</b>              | 0.120                                       | 0.218                                       |
| <b>750</b>              | 0.288                                       | 0.324                                       |

**Table S2.** Values of polarization resistance component in fitted equivalent circuit at OCV.

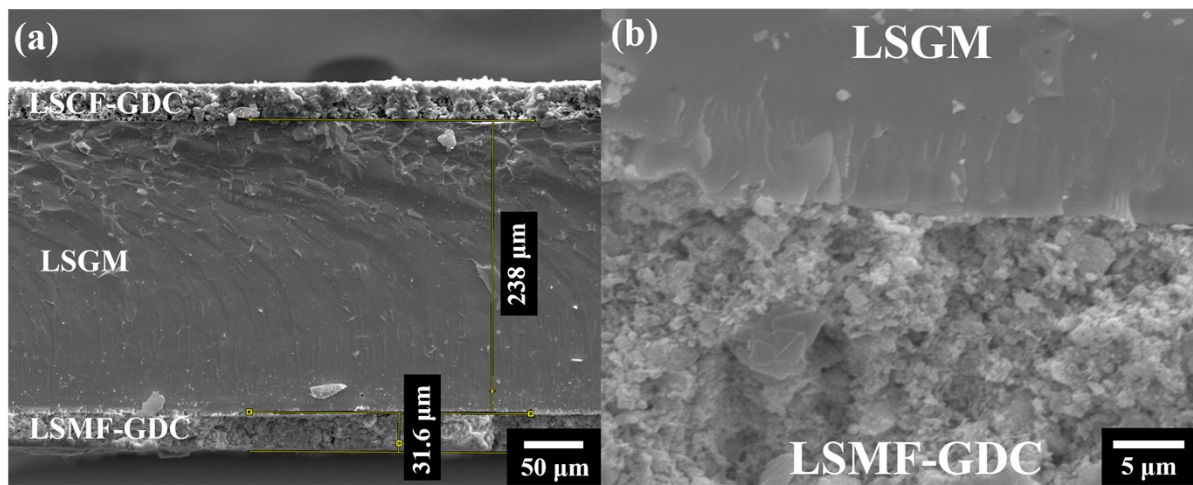

**Fig S1.** The SEM image of (a) cross-section of button cell (LSMF-GDC|LSGM|LSCF-GDC) and (b) porous structure of LSMF-GDC electrode.

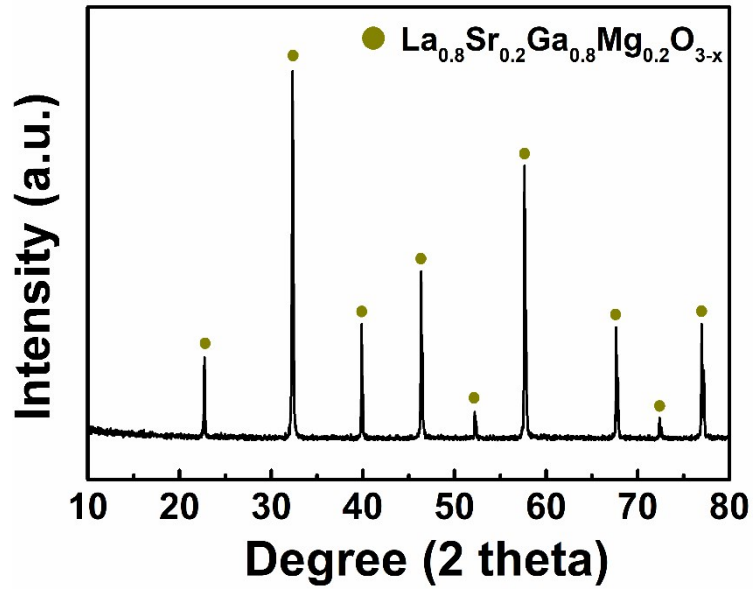

**Fig S2.** XRD pattern of grounded LSGM pellet measured after twice-sintered process (XRD measurement condition: 40kV and 30 mA).

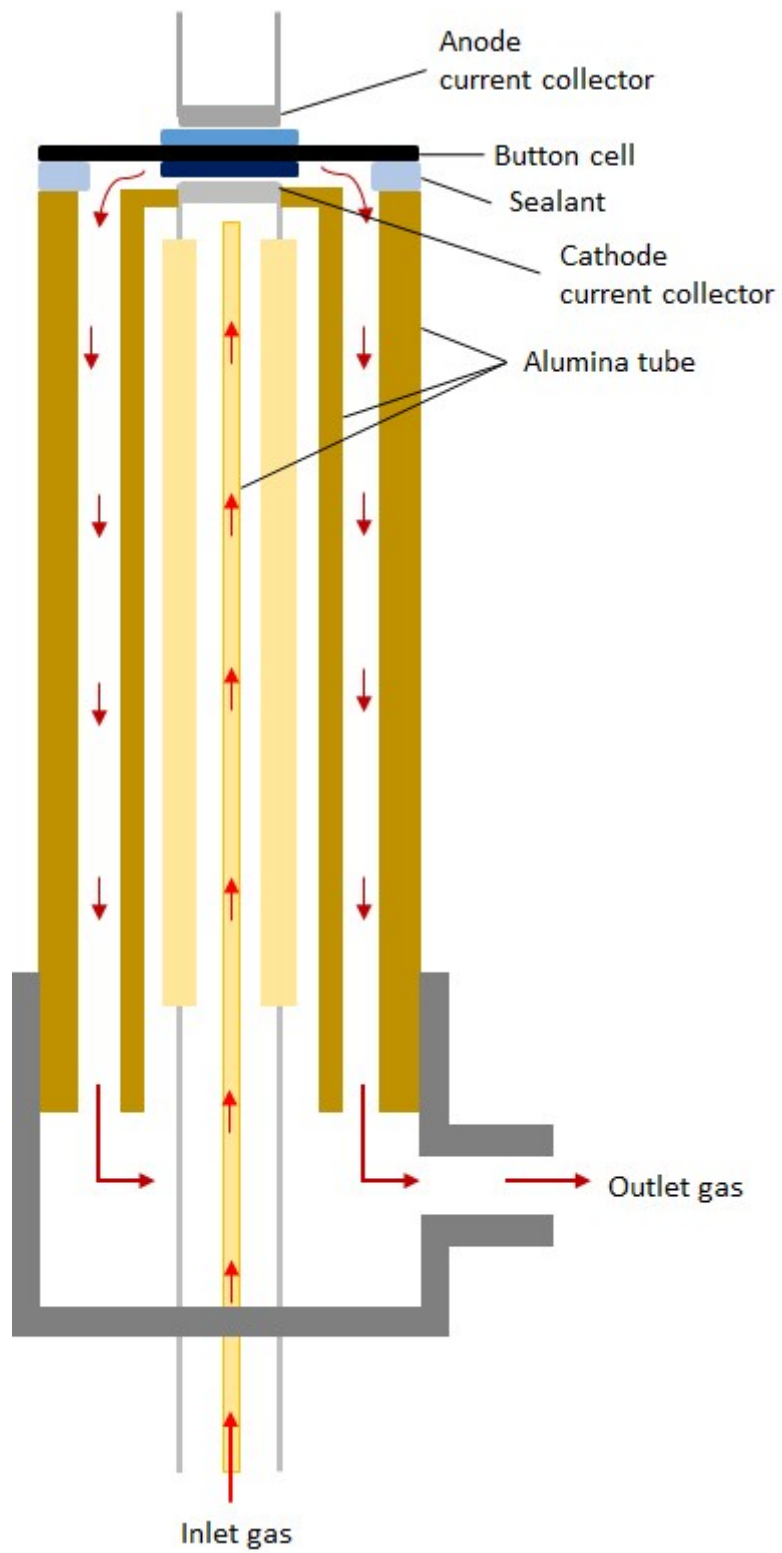

**Fig S3.** Schematic diagram of SOEC test reactor for high temperature CO<sub>2</sub> electrolysis.

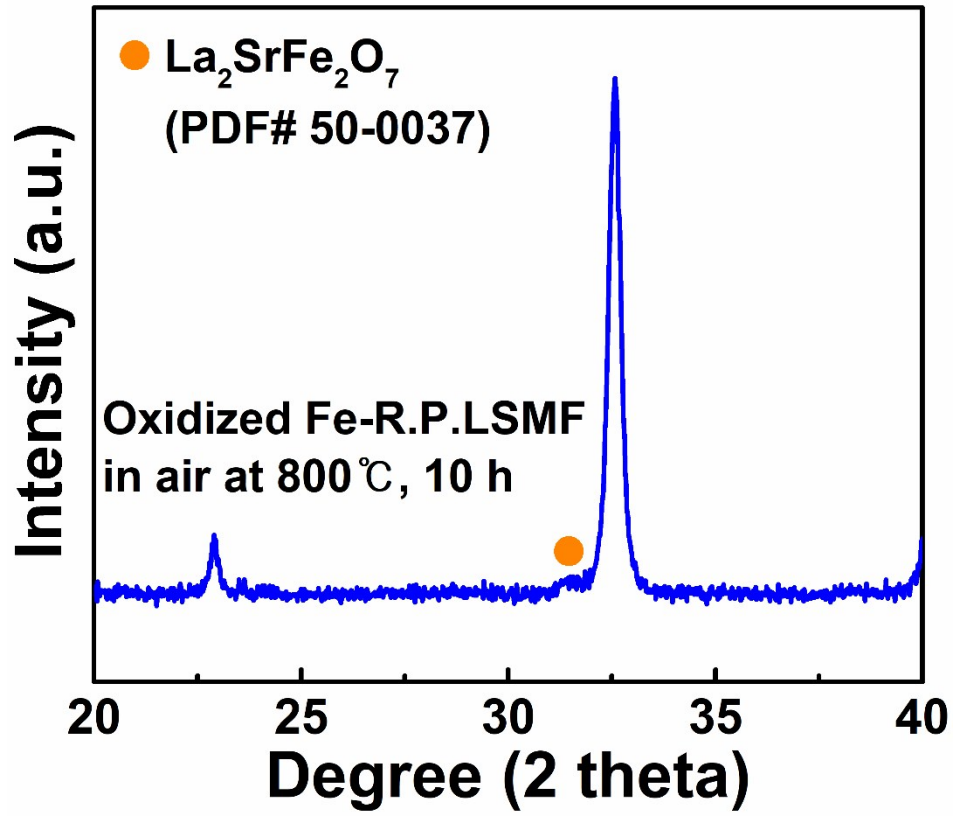

**Figure S4.** XRD pattern of oxidized Fe-R.P.LSMF in the  $2\theta$  range from 20 ° to 40 °.

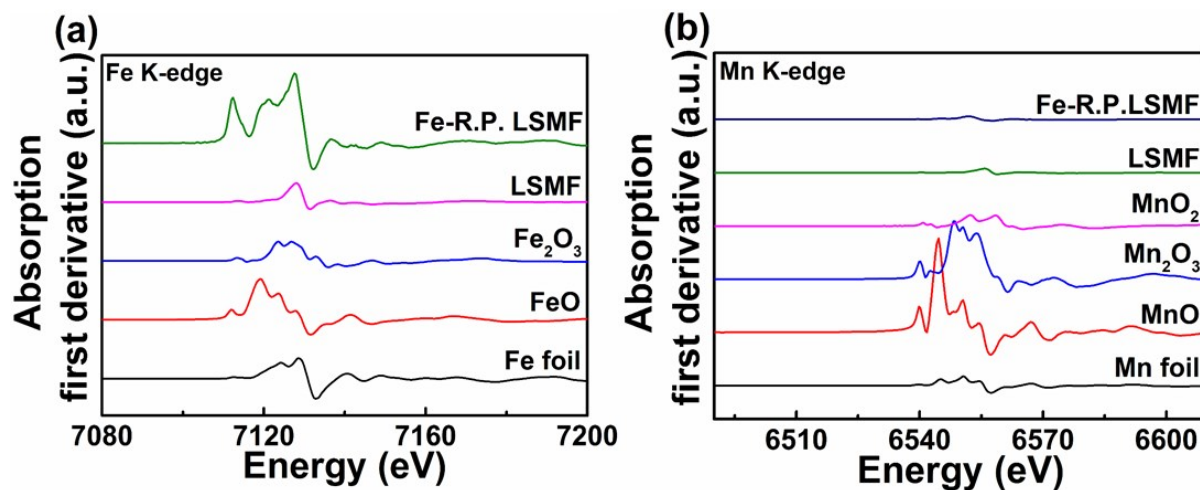

**Fig S5.** First derivatives of (a) Fe K-edge and (b) Mn K-edge XANES spectra of reference oxides, LSMF and Fe-R.P.LSMF.



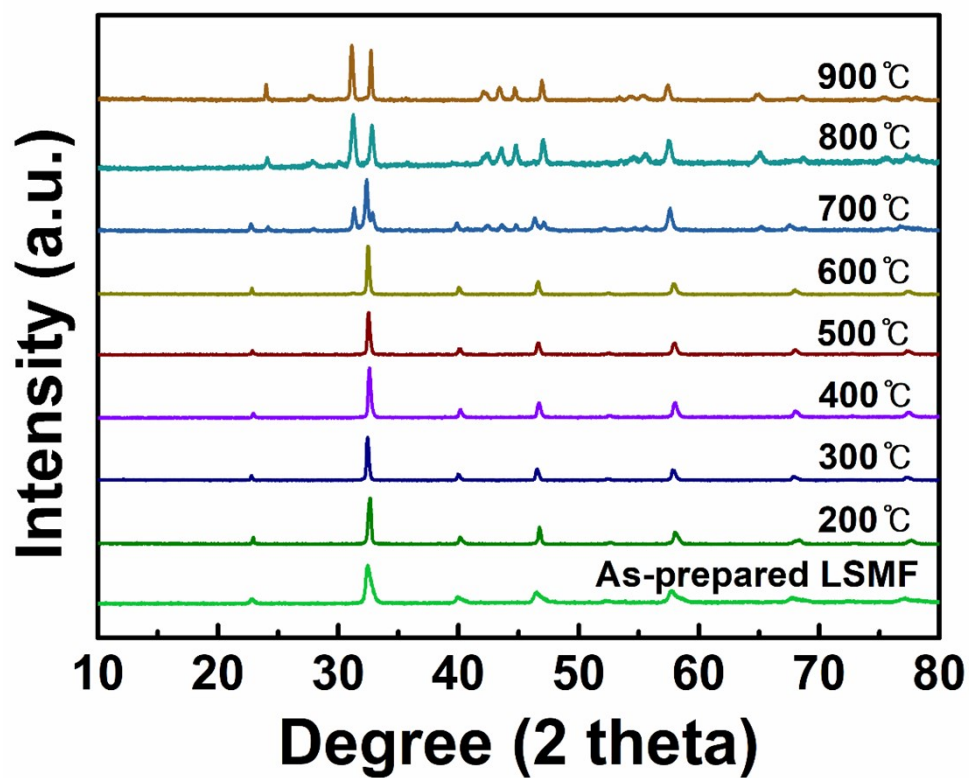

**Fig S6.** XRD patterns of LSMF after treated in 20% H<sub>2</sub>/N<sub>2</sub> atmosphere from room temperature to 900 °C.

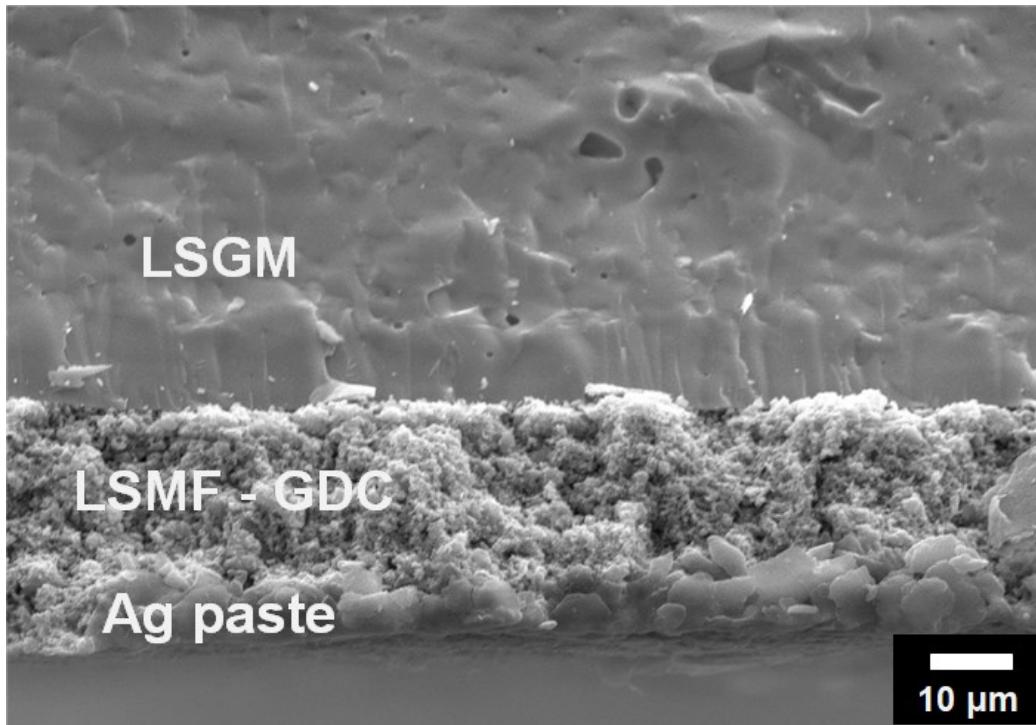

**Figure S7.** The cross-sectional SEM image of button cell after reduction process.

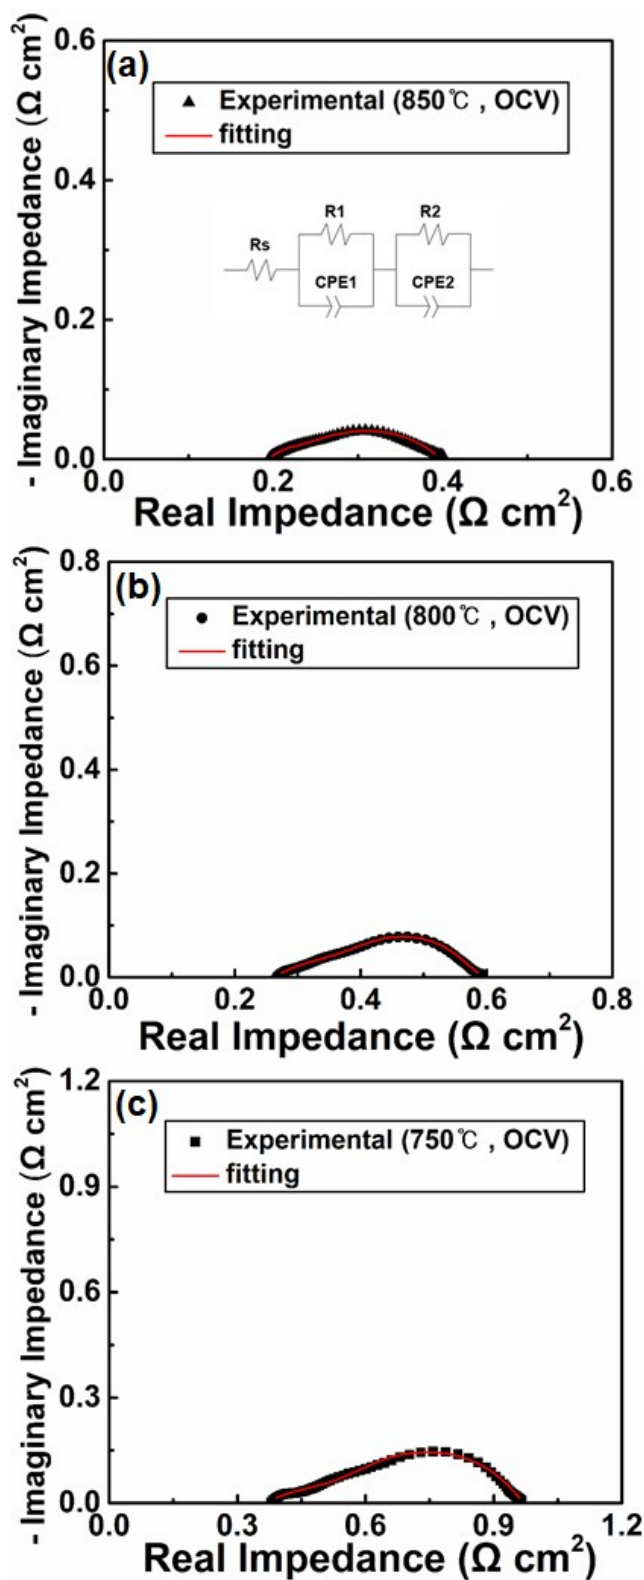

**Fig S8.** EIS profiles and its fitted data of inserted equivalent circuit at OCV with respect to temperatures of (a) 850 °C, (b) 800 °C, and (c) 750 °C.

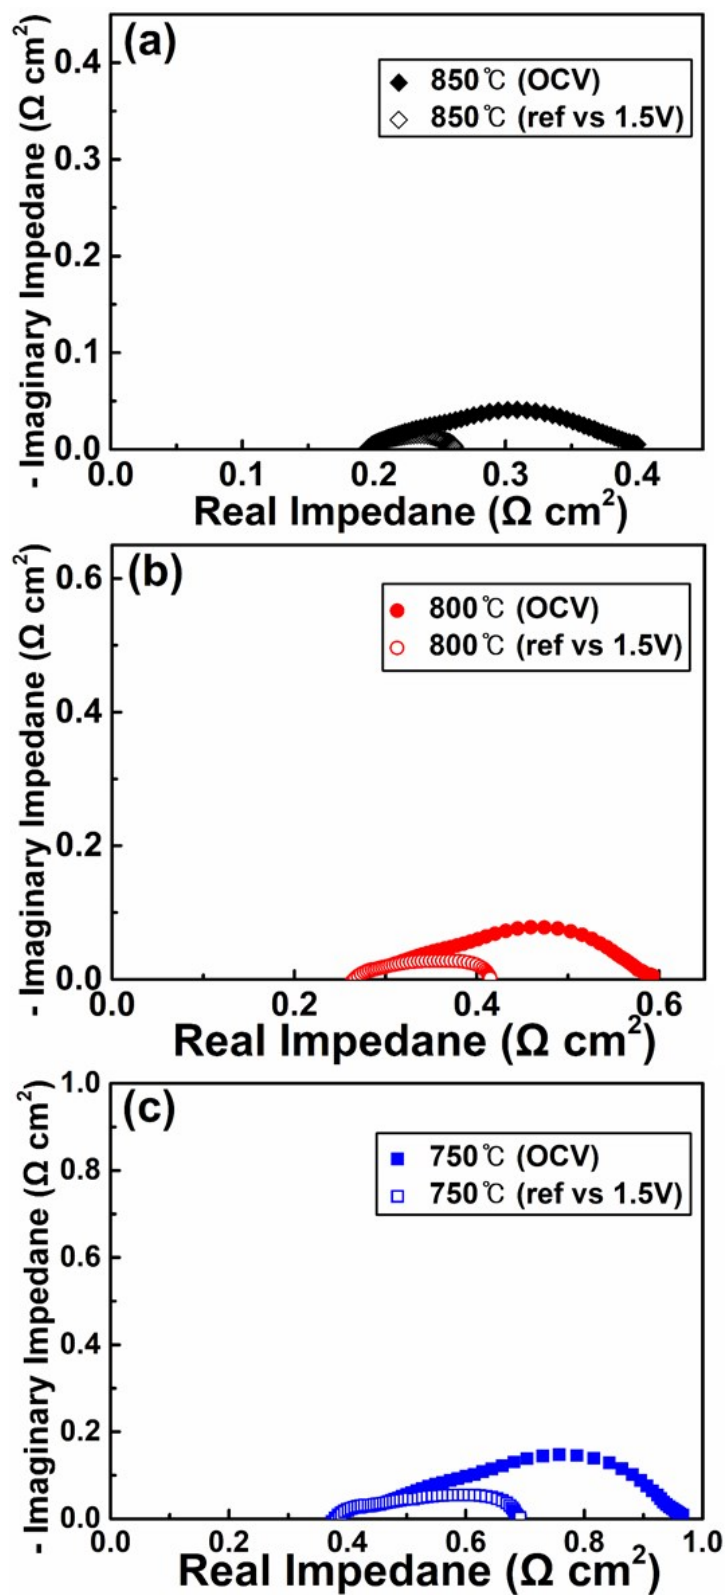

**Fig S9.** EIS profiles under OCV and operating voltage of 1.5 V at temperatures of (a) 850 °C, (b) 800 °C, and (c) 750 °C.

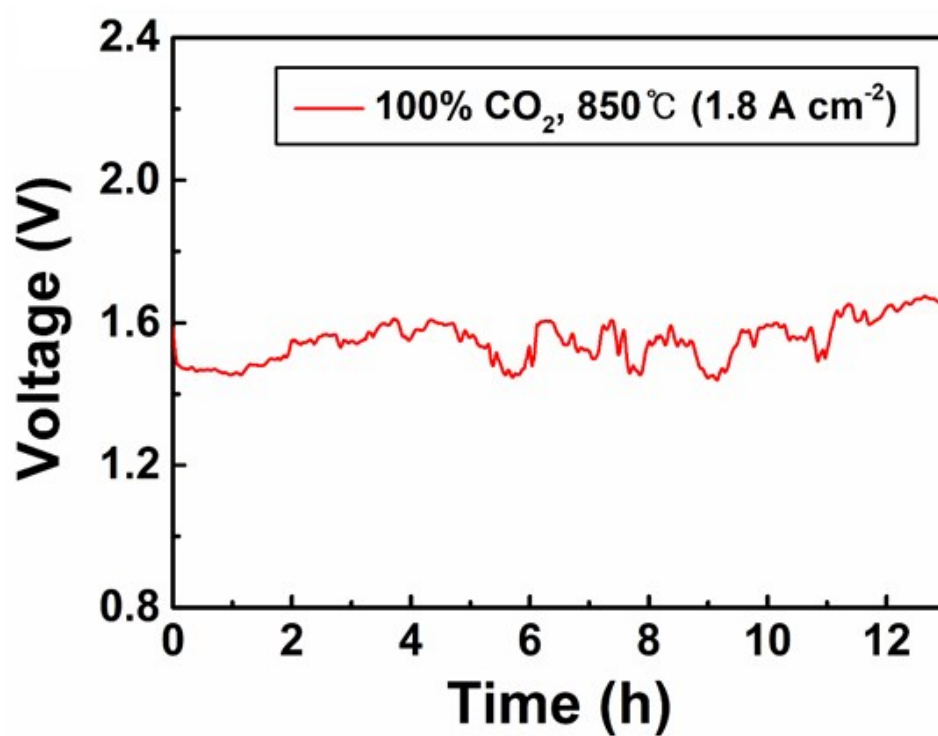

**Fig S10.** The voltage profile of the button cell during 13h operation with an applied constant current of  $1.8 \text{ A}\cdot\text{cm}^{-2}$  in a pure  $\text{CO}_2$  at  $850 \text{ }^\circ\text{C}$ .

## Reference

- [S1]Y. Li, B. Hu, C. Xia, W. Q. Xu, J. P. Lemmon, F. Chen, *J. Mater. Chem. A*, 2017, 5, 20833-20842.
- [S2]S. Liu, Q. Liu, J. L. Luo, *ACS Catal.*, 2016, 6, 6219-6228.
- [S3]S. Ding, M. Li, W. Pang, B. Hua, N. Duan, Y. Q. Zhang, S. N. Zhang, J. L. Luo, *Electrochim. Acta*, 2020, 335, 135683.
- [S4]S. Park, Y. Kim, Y. Noh, T. Kim, H. Han, W. Yoon, J. Choi, S. Yi, W. Lee, W. B. Kim, *J. Mater. Chem. A*, 8, 138-148.
- [S5]S. Park, Y. Kim, H. Han, Y. S. Chung, W. Yoon, J. Choi, W. B. Kim, *Appl. Catal. B-Environ.*, 2019, 248, 147-156.
- [S6]H. Lv, L. Lin, X. Zhang, D. Gao, Y. Song, Y. Zhou, Q. Liu, G. Wang, X. Bao, *J. Mater. Chem. A*, 2019, 7, 11967-11975.
- [S7]L. Chen, J. Xu, X. Wang, K. Xie, *Int. J. Hydrog. Energy*, 2020, 45, 11901-11907
- [S8]S. Liu, Q. Liu, J. L. Luo, *J. Mater. Chem. A*, 2016, 4, 17521-17528.
- [S9]L. Ye, M. Zhang, P. Huang, G. Guo, M. Hong, C. Li, J. T. Irvine, K. Xie, *Nat. Commun.*, 2017, 8, 14785.
- [S10]H. Li, G. Sun, K. Xie, W. Qi, Q. Qin, H. Wei, S. Chen, Y. Wang, Y. Zhang, Y. Wu, *Int. J. Hydrog. Energy*, 2014, 39, 20888-20897.
- [S11]C. Ruan, K. Xie, *Catal. Sci. Technol.*, 2015, 5, 1929-1940.
